# Supplementary material for: Learning to recognize letters in the periphery: Effects of repeated exposure, letter frequency, and letter complexity
Source: PubMed Central journal article supplement — J Vis. 2017 Mar 6;17(3):3. doi: 10.1167/17.3.3 (PMC5347662; doi:10.1167/17.3.3), 2017-03-06
Supplement: jovi-17-03-04_s01.pdf [file jovi-17-03-04_s01.pdf]

## Supplemental results

---

| Letter | Letter frequency (%) | Letter complexity | Pre-test accuracy (%) |
|--------|----------------------|-------------------|-----------------------|
| a      | 8.53                 | 156               | 39                    |
| b      | 1.40                 | 177               | 47                    |
| c      | 3.18                 | 119               | 22                    |
| d      | 3.84                 | 176               | 43                    |
| e      | 12.55                | 154               | 71                    |
| f      | 2.10                 | 159               | 82                    |
| g      | 1.96                 | 180               | 50                    |
| h      | 4.79                 | 173               | 69                    |
| i      | 7.34                 | 120               | 48                    |
| j      | 0.11                 | 131               | 79                    |
| k      | 0.75                 | 163               | 50                    |
| l      | 4.14                 | 120               | 54                    |
| m      | 2.38                 | 194               | 81                    |
| n      | 7.35                 | 150               | 27                    |
| o      | 7.67                 | 118               | 33                    |
| p      | 2.04                 | 191               | 71                    |
| q      | 0.09                 | 188               | 29                    |
| r      | 6.71                 | 126               | 45                    |
| s      | 6.79                 | 137               | 57                    |
| t      | 8.93                 | 127               | 45                    |
| u      | 2.62                 | 141               | 62                    |
| v      | 1.06                 | 130               | 43                    |
| w      | 1.65                 | 178               | 69                    |
| x      | 0.20                 | 155               | 65                    |
| y      | 1.72                 | 161               | 79                    |
| z      | 0.11                 | 132               | 54                    |

---

Table S1. Letter complexity, letter frequency, and pre-test accuracy for each of the 26 letters. Pre-test accuracy was calculated across all six groups.

| Predictive term                              | Coefficient | 95% CI           | sr <sup>2</sup> |
|----------------------------------------------|-------------|------------------|-----------------|
| log(Letter exposure)                         | 16.23       | [4.88, 27.64]    | 0.08            |
| Letter frequency                             | -1.14       | [-1.61, -0.73]   | 0.06            |
| Letter complexity                            | -0.10       | [-0.17, -0.03]   | 0.02            |
| log(Pre-test accuracy)                       | -37.04      | [-51.92, -24.08] | 0.37            |
| log(Letter exposure): log(Pre-test accuracy) | -7.72       | [-14.36, -1.19]  | 0.01            |
| Intercept                                    | 89.8        | [65.30, 116.86]  |                 |

Table S2. Results of regression model for improvement ( $R^2 = 0.58$ ;  $R^2_{adj} = 0.56$ ). Dependent variable is middle-letter improvement. Predictors are three-letter exposure, letter frequency, letter complexity, and pre-test performance. 95% CI—95% bootstrapped confidence interval. sr<sup>2</sup>—the squared semipartial correlation.

| Predictive term                              | Coefficient | 95% CI           | sr <sup>2</sup> |
|----------------------------------------------|-------------|------------------|-----------------|
| log(Letter exposure)                         | 30.92       | [14.97, 49.85]   | 0.12            |
| Letter frequency                             | -0.49       | [-0.77, -0.24]   | 0.02            |
| Letter complexity                            | -0.07       | [-0.11, -0.03]   | 0.02            |
| log(Pre-test accuracy)                       | -51.09      | [-74.45, -23.87] | 0.44            |
| log(Letter exposure): log(Pre-test accuracy) | -15.37      | [-25.43, -6.82]  | 0.03            |
| Intercept                                    | 111.33      | [62.17, 155.38]  |                 |

Table S3. Results of regression model for improvement ( $R^2 = 0.71$ ;  $R^2_{adj} = 0.70$ ). Dependent variable is three-letter improvement. Predictors are three-letter exposure, letter frequency, letter complexity, and pre-test (three-letter) performance. 95% CI—95% bootstrapped confidence interval. sr<sup>2</sup>—the squared semipartial correlation.

| Predictive term      | Coefficient | 95% CI         | sr <sup>2</sup> |
|----------------------|-------------|----------------|-----------------|
| log(Letter exposure) | 20.79       | [7.31, 35.23]  | 0.12            |
| Letter frequency     | -1.09       | [-1.56, -0.67] | 0.06            |

|                                              |        |                  |      |
|----------------------------------------------|--------|------------------|------|
| Letter complexity                            | -0.09  | [-0.15, -0.02]   | 0.02 |
| log(Pre-test accuracy)                       | -34.38 | [-48.93, -21.45] | 0.33 |
| log(Letter exposure): log(Pre-test accuracy) | -9.81  | [-18.10, -1.94]  | 0.02 |
| Intercept                                    | 81.84  | [58.55, 107.17]  |      |

Table S4. Results of regression model for improvement when including trials with target misplacement errors and treating misplaced responses as incorrect ( $R^2 = 0.57$ ;  $R^2_{adj} = 0.56$ ). Dependent variable is middle-letter improvement. Predictors are middle-letter exposure, letter frequency, letter complexity, and pre-test performance. 95% CI—95% bootstrapped confidence interval.  $sr^2$ —the squared semipartial correlation.

| Predictive term                              | Coefficient | 95% CI           | $sr^2$ |
|----------------------------------------------|-------------|------------------|--------|
| log(Letter exposure)                         | 21.17       | [7.11, 35.61]    | 0.07   |
| Letter frequency                             | -1.14       | [-1.62, -0.74]   | 0.06   |
| Letter complexity                            | -0.09       | [-0.16, -0.03]   | 0.02   |
| log(Pre-test accuracy)                       | -38.58      | [-53.03, -24.38] | 0.38   |
| log(Letter exposure): log(Pre-test accuracy) | -10.35      | [-18.62, -2.34]  | 0.02   |
| Intercept                                    | 92.12       | [66.78, 119.25]  |        |

Table S5. Results of regression model for improvement when including trials with target misplacement errors and treating misplaced responses as correct ( $R^2 = 0.58$ ;  $R^2_{adj} = 0.57$ ). Dependent variable is middle-letter improvement. Predictors are middle-letter exposure, letter frequency, letter complexity, and pre-test performance. 95% CI—95% bootstrapped confidence interval.  $sr^2$ —the squared semipartial correlation.
